# Supplementary material for: Aromatic hydroxylation of anthracene derivatives by a chromium(iii)-superoxo complex via proton-coupled electron transfer
Source: Royal Society of Chemistry journal article supplement (doi:10.1039/c9cc03245b), 2019-01-01
Supplement: c9cc03245b1.pdf [file c9cc03245b1.pdf]

## Electronic Supplementary Information

### **Aromatic Hydroxylation of Anthracene Derivatives by a Chromium(III)- Superoxo Complex *via* Proton-Coupled Electron Transfer**

Tarali Devi,<sup>a</sup> Yong-Min Lee,<sup>a</sup> Wonwoo Nam,<sup>\*a</sup> and Shunichi Fukuzumi<sup>\*a,b</sup>

<sup>a</sup>Department of Chemistry and Nano Science, Ewha Womans University, Seoul 03760,  
Korea

<sup>b</sup>Faculty of Science and Engineering, Meijo University, Nagoya, Aichi 468-8502, Japan

\* To whom correspondence should be addressed.

E-mail: wwnam@ewha.ac.kr, fukuzumi@chem.eng.osaka-u.ac.jp

## Experimental Section

**Materials.** All chemicals, which were of reagent-grade quality, were obtained commercially and used without further purification, unless otherwise noted. Solvents were dried according to published procedures and distilled under an Ar atmosphere prior to use.<sup>S1</sup> Anthracene and its derivatives, such as 9-methylantracene, 9-bromoanthracene, 9-anthracenecarboxaldehyde and 9,10-dimethylantracene, were purchased from Aldrich Chemical Co. and used as received. Trifluoromethanesulfonic acid (triflic acid; CF<sub>3</sub>SO<sub>3</sub>H; HOTf) was purchased from Tokyo Chemical Industry Co., LTD. The deuterated anthracene compound (anthracene-*d*<sup>10</sup>) was also purchased from Aldrich Chemical Co. and used as received. <sup>18</sup>O<sub>2</sub> gas (98% <sup>18</sup>O-enriched) was purchased from ICON Services Inc. (Summit, NJ, USA). The chromium complexes, [(TMC)Cr<sup>II</sup>(Cl)]Cl, [(TMC)Cr<sup>III</sup>(O<sub>2</sub><sup>•-</sup>)(Cl)]Cl (**1**), and [(TMC)Cr<sup>III</sup>(<sup>18</sup>O<sub>2</sub><sup>•-</sup>)(Cl)]Cl (**1**-<sup>18</sup>O), were synthesized according to the literature methods.<sup>S2, S3</sup>

**Instrumentation.** UV-vis spectra were recorded on a Hewlett Packard 8453 diode array spectrophotometer equipped with a UNISOKU Scientific Instruments Cryostat USP-203A for low-temperature experiments or on a UNISOKU RSP-601 stopped-flow spectrometer equipped with a MOS-type highly sensitive photodiode-array. Cold spray ionization mass (CSI-MS) spectra were collected on a JMS-T100CS (JEOL) mass spectrometer equipped with a CSI source [conditions: needle voltage = 2.2 kV, orifice 1 current = 50 – 500 nA, orifice 1 voltage = 0 – 20 V, ringlens voltage = 10 V, ion source temperature = 5 °C, spray temperature = –40 °C]. X-band CW-EPR spectra were recorded at 5 K using an X-band Bruker EMX-plus spectrometer equipped with a dual mode cavity (ER 4116DM) [experimental parameters: microwave frequency = 9.647 GHz, microwave power = 1.0 mW, modulation amplitude = 10 G, gain = 1 × 10<sup>4</sup>, modulation frequency = 100 kHz, time constant = 40.96 ms, conversion time = 81.00 ms]. Product analysis was performed by <sup>1</sup>H NMR measurements on a Bruker model digital AVANCE III 400 FT-NMR spectrometer. Product analysis was also performed with Thermo Finnigan (Austin, Texas, USA) FOCUS DSQ (dual stage quadrupole) mass spectrometer interfaced with Finnigan FOCUS gas chromatograph (GC-MS).

**Kinetic Measurements.** Typically, kinetic measurements for the oxidation of anthracene and its derivatives, such as 9-substituted anthracene derivatives (XAn: 9-methylantracene, 9-bromoanthracene and 9-anthracenecarboxaldehyde) and 9,10-dimethylantracene, by [(TMC)Cr<sup>III</sup>(O<sub>2</sub><sup>•-</sup>)]<sup>2+</sup> (**1**) in the presence of HOTf (2.5 mM) were performed on a UNISOKU RSP-601 stopped-flow spectrometer in MeCN at 233 K under the conditions such that [1] = [substrate]. Rates of oxidation of anthracene and 9-substituted anthracene derivatives (XAn) by **1** were monitored by following the decay of the absorption band at 550 nm due to **1** in the presence of HOTf (2.5 mM) in MeCN at 233 K. The second-order rate constants (*k*<sub>ox</sub>) for 6-electron oxidation of anthracene, 4-electron oxidation of XAn, and 2-electron

oxidation of 9,10-dimethylantracene by **1** (3-electron oxidant) in the presence of HOTf (2.5 mM) in MeCN at 233 K were determined using eqn (5) in text, eqn (S5) and eqn (S10) in ESI, respectively.

#### Determination of $k_{ox}$ value for the four-electron oxidation of substrate by 3-electron oxidant.

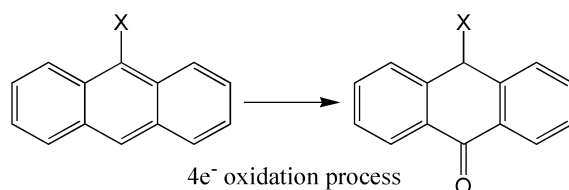

$$\text{rate} = -d[\text{Cr}^{\text{III}}(\text{O}_2)]/dt = k_{ox}[\text{Cr}^{\text{III}}(\text{O}_2)][\text{XAn}] \quad (\text{S1})$$

$$[\text{Cr}^{\text{III}}(\text{O}_2)]_0 = [\text{Cr}^{\text{III}}(\text{O}_2)] + [\text{Cr}^{\text{III}}] \quad (\text{S2})$$

$$[\text{XAn}]_0 = [\text{XAn}] + (4/3)[\text{Cr}^{\text{III}}] \quad (\text{S3})$$

$$\text{Thus, } -d[\text{Cr}^{\text{III}}(\text{O}_2)]/dt = k_{ox}[\text{Cr}^{\text{III}}(\text{O}_2)]([\text{XAn}]_0 - (4/3)[\text{Cr}^{\text{III}}(\text{O}_2)]_0 + (4/3)[\text{Cr}^{\text{III}}(\text{O}_2)]) \quad (\text{S4})$$

Solving the differential eqn (S4) with eqns. (S2) and (S3) gives eqn (S5),

$$\log [x/(C + (4/3)x)] = -(C/2.3)k_{ox}t + \log [x_0/(C + (4/3)x_0)] \quad (\text{S5})$$

where  $x = [\text{Cr}^{\text{III}}(\text{O}_2)]$ ,  $x_0 = [\text{Cr}^{\text{III}}(\text{O}_2)]_0$ ,  $C = [\text{XAn}]_0 - (4/3)[\text{Cr}^{\text{III}}(\text{O}_2)]_0$ ,  $x_0/(C + (4/3)x_0) = 1$ . Thus, plot of  $\log[x/(C + (4/3)x)]$  vs.  $t$  gives a straight line that passes through zero with slope =  $-(C/2.3)k_{ox}$ , where  $C$  is  $-(1/3)x_0$ .

#### Determination of $k_{ox}$ value for the two-electron oxidation of substrate by 3-electron oxidant.

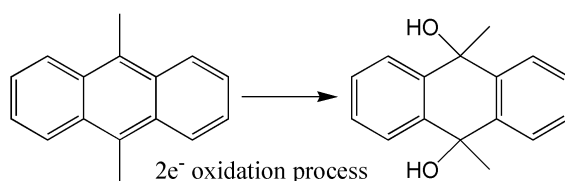

$$\text{rate} = -d[\text{Cr}^{\text{III}}(\text{O}_2)]/dt = k_{ox}[\text{Cr}^{\text{III}}(\text{O}_2)][\text{Me}_2\text{An}] \quad (\text{S6})$$

$$[\text{Cr}^{\text{III}}(\text{O}_2)]_0 = [\text{Cr}^{\text{III}}(\text{O}_2)] + [\text{Cr}^{\text{III}}] \quad (\text{S7})$$

$$[\text{Me}_2\text{An}]_0 = [\text{Me}_2\text{An}] + (2/3)[\text{Cr}^{\text{III}}] \quad (\text{S8})$$

$$\text{Thus, } -d[\text{Cr}^{\text{III}}(\text{O}_2)]/dt = k_{ox}[\text{Cr}^{\text{III}}(\text{O}_2)]([\text{Me}_2\text{An}]_0 - (2/3)[\text{Cr}^{\text{III}}(\text{O}_2)]_0 + (2/3)[\text{Cr}^{\text{III}}(\text{O}_2)]) \quad (\text{S9})$$

Solving the differential eqn (S9) with eqns (S7) and (S8) gives eqn (S10),

$$\log [x/(C + (2/3)x)] = -(C/2.3)k_{ox}t + \log [x_0/(C + (2/3)x_0)] \quad (\text{S10})$$

where  $x = [\text{Cr}^{\text{III}}(\text{O}_2)]$ ,  $x_0 = [\text{Cr}^{\text{III}}(\text{O}_2)]_0$ ,  $C = [\text{Me}_2\text{An}]_0 - (2/3)[\text{Cr}^{\text{III}}(\text{O}_2)]_0$ ,  $x_0/(C + (2/3)x_0) = 1$ . Thus, plot of  $\log[x/(C + (2/3)x)]$  vs.  $t$  gives a straight line that passes through zero with slope =  $-(C/2.3)k_{ox}$ , where  $C$  is  $(1/3)x_0$ .

## References

- S1 W. L. F. Armarego, C. L. L. Chai, in *Purification of Laboratory Chemicals*, 6th ed., Pergamon Press, Oxford, 2009.
- S2 J. Cho, J. Woo and W. Nam, *J. Am. Chem. Soc.*, 2010, **132**, 5958.
- S3 J. Cho, J. Woo and W. Nam, *J. Am. Chem. Soc.*, 2012, **134**, 11112.

**Table S1** Second-order rate constants ( $k_{\text{ox}}$ ) determined in the oxidation of anthracene by **1** in the presence of various concentrations of HOTf in MeCN at 233 K.

| [HOTf], mM | $k_{\text{ox}}, \text{M}^{-1} \text{s}^{-1}$ |
|------------|----------------------------------------------|
| 2.5        | $4.1(4) \times 10$                           |
| 5.0        | $1.0(1) \times 10^2$                         |
| 7.5        | $2.3(2) \times 10^2$                         |
| 10.0       | $4.6(3) \times 10^2$                         |

**Table S2** Second-order rate constants ( $k_{\text{ox}}$ ) determined in the oxidation of anthracene and its derivatives by **1** in the presence of HOTf (2.50 mM) in MeCN at 233 K

| Substrate                  | $E_{\text{ox}}$ , V vs. SCE | $k_{\text{ox}}$ , $\text{M}^{-1} \text{s}^{-1}$ |
|----------------------------|-----------------------------|-------------------------------------------------|
| 9,10-dimethylantracene     | 1.05 <sup>a</sup>           | $4.8(4) \times 10^2$                            |
| 9-methylantracene          | 1.11 <sup>a</sup>           | $1.3(1) \times 10^2$                            |
| anthracene                 | 1.19 <sup>a</sup>           | $4.1(4) \times 10$                              |
| 9-bromoanthracene          | 1.30 <sup>a</sup>           | $3.3(3) \times 10$                              |
| 9-anthracenecarboxaldehyde | 1.37 <sup>b</sup>           | 5.0(4)                                          |

<sup>a</sup>Taken from the reference: S. Fukuzumi, K. Okhubo and T. Okamoto, *J. Am. Chem. Soc.*, 2002, **124**, 14147. <sup>b</sup>Taken from the reference: S. Okazaki, M. Oyama and S. Nomura, *Electroanalysis*, 1997, **9**, 1242.

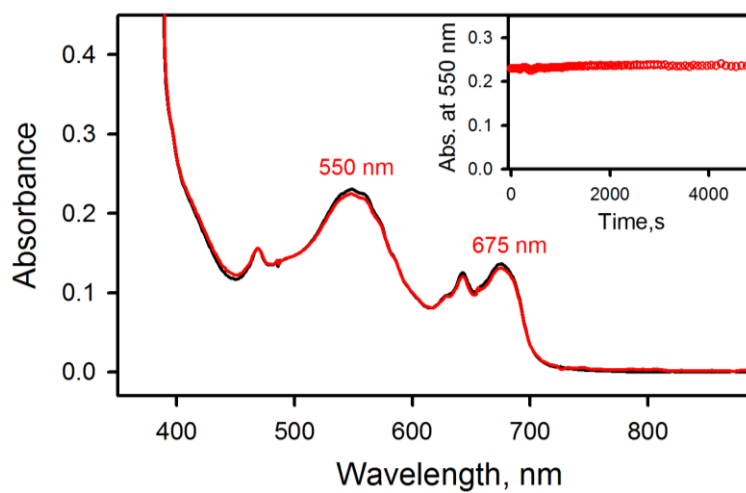

**Fig. S1** UV-vis spectra of **1** (1.0 mM) in the absence (red line) and presence (black line) of anthracene (1.0 mM) in MeCN at 233 K. No reaction between **1** and anthracene was observed.

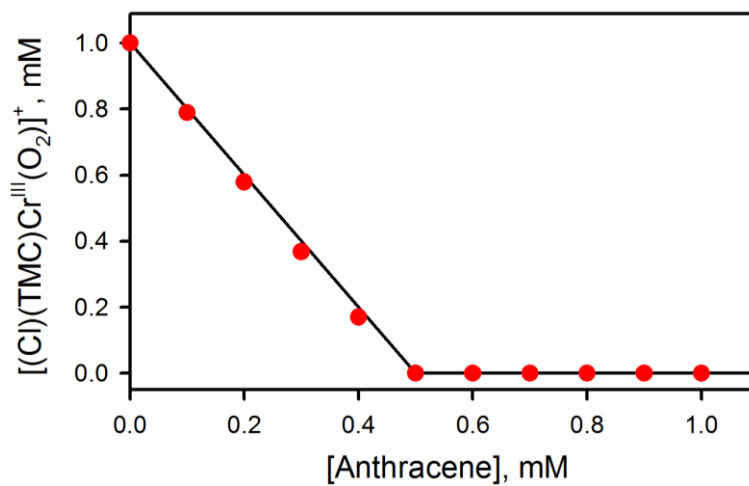

**Fig. S2** Titration for the disappearance of **1** (red circles) as a function of the concentration of anthracene (0 – 1.0 mM) added to the solution of **1** (1.0 mM) in increments of 0.10 mM in the presence of HOTf (1.0 mM) in MeCN at 233 K.



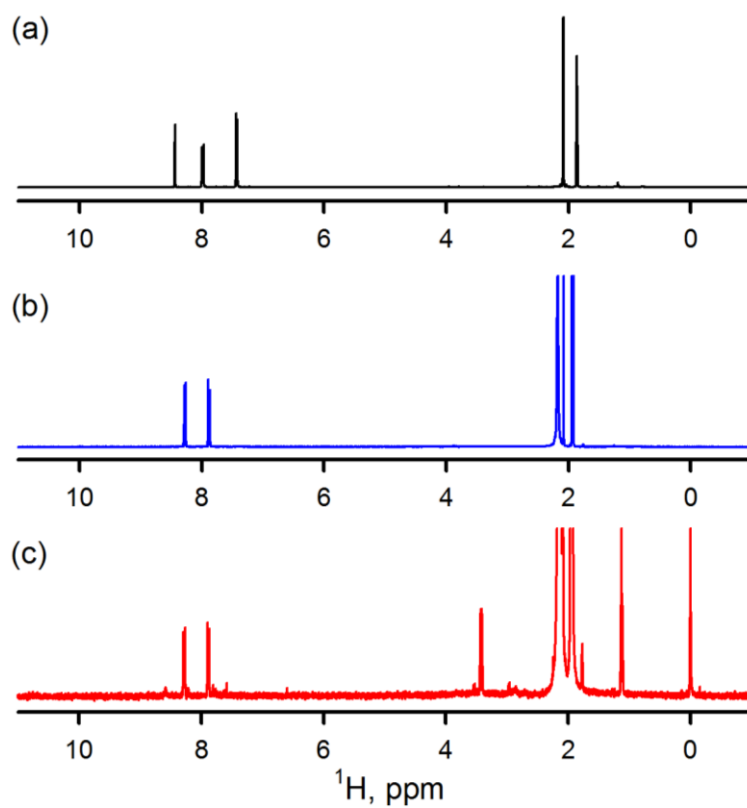

**Fig. S3**  $^1\text{H}$  NMR spectra of (a) anthracene (10 mM) and (b) anthraquinone (10 mM) as the authentic references, and (c) the reaction products obtained in the oxidation of anthracene (1.0 mM) by **1** (2.0 mM) in the presence of HOTf (2.0 mM) in  $\text{MeCN-}d_3$  at 233 K.

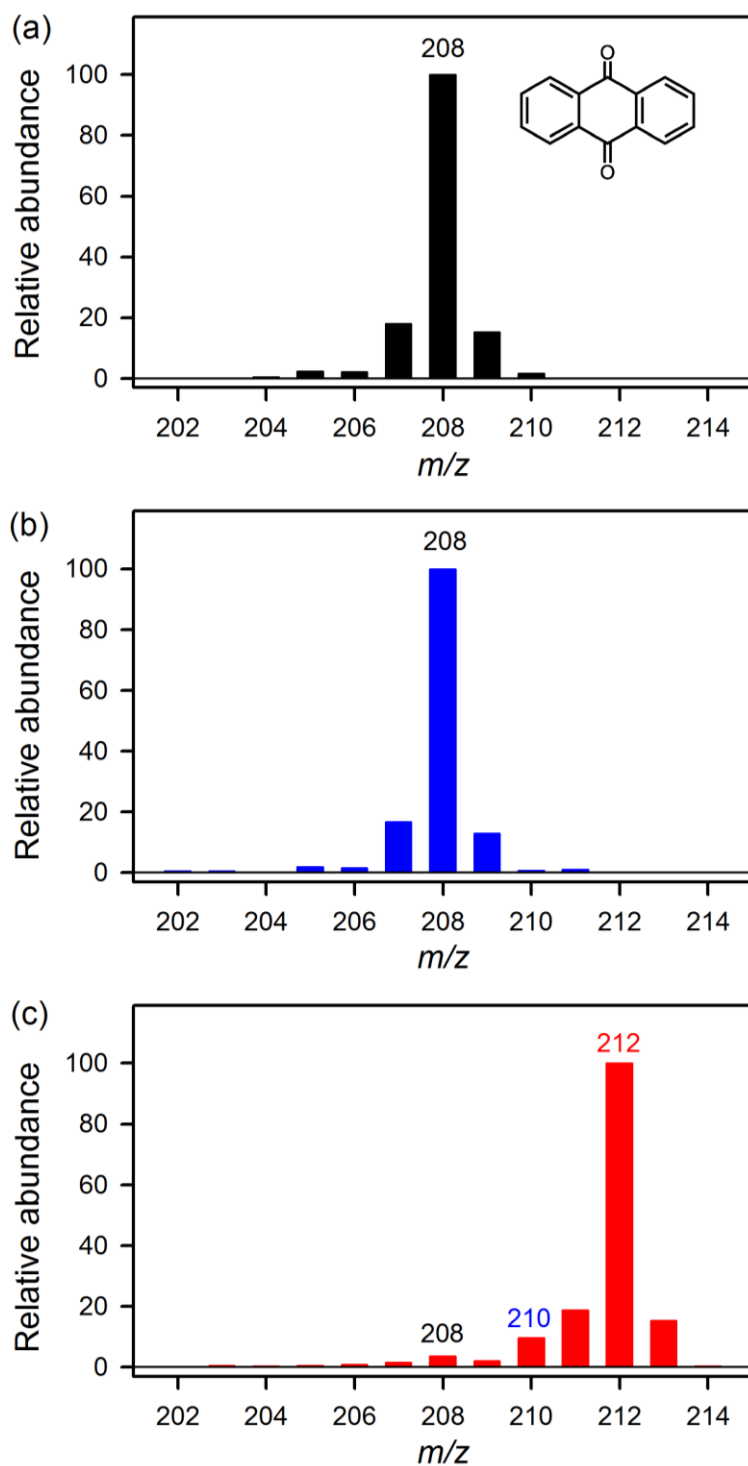

**Fig. S4** GC-MS spectra of (a) anthraquinone (1.0 mM) as an authentic reference and (b, c) the reaction solutions obtained in the oxidation of anthracene (0.50 mM) by (b)  $1\text{-}^{16}\text{O}_2$  (1.0 mM) and (c)  $1\text{-}^{18}\text{O}_2$  (1.0 mM) in the presence of HOTf (1.0 mM) in MeCN at 233 K. The percentage of  $^{18}\text{O}$  in anthraquinone product in (c) was determined to be 94(4)% by comparison of the relative abundances at  $m/z = 212$  for anthraquinone- $^{18}\text{O}$ ,  $^{18}\text{O}$ ,  $m/z = 210$  for anthraquinone- $^{16}\text{O}$ ,  $^{18}\text{O}$  and  $m/z = 208$  for anthraquinone- $^{16}\text{O}$ ,  $^{16}\text{O}$ .

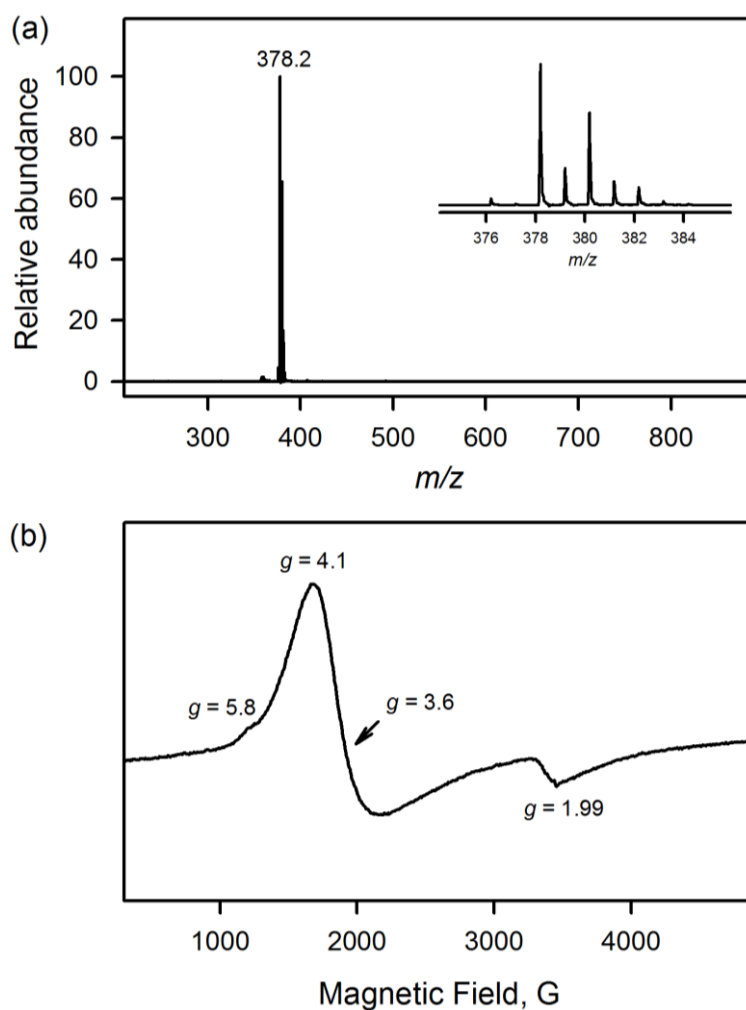

**Fig. S5** (a) CSI-MS spectrum of the complete reaction solution obtained in the oxidation of anthracene (0.50 mM) by **1** (1.0 mM) in the presence of HOTf (1.0 mM) in MeCN at 233 K. The peak at  $m/z = 378.2$  corresponds to  $[\text{Cr}^{\text{III}}(\text{TMC})(\text{Cl}_2)]^+$  (*calc. m/z* = 378.1). Inset shows the isotope distribution pattern of the peak at  $m/z = 378.2$ . (b) X-band EPR spectrum of the complete reaction solution obtained in the oxidation of anthracene (0.50 mM) by **1** (1.0 mM) in the presence of HOTf (1.0 mM) in MeCN at 233 K. The spectrum was recorded at 5 K.

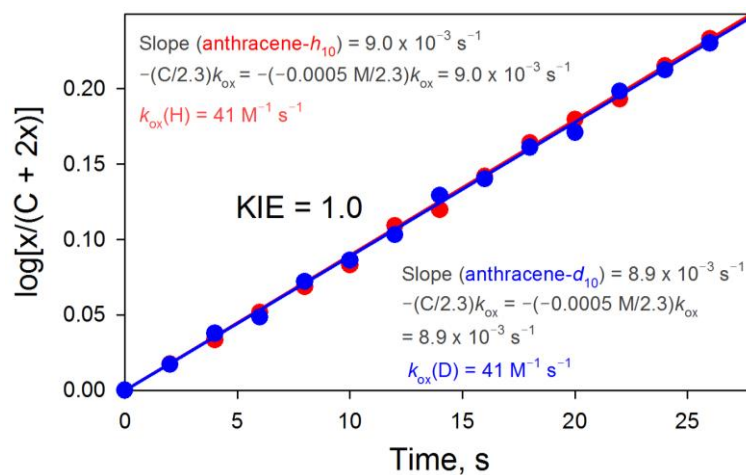

**Fig. S6** Plots of  $\log[x/(C + 2x)]$  vs. time for the oxidation of anthracene- $h_{10}$  (0.50 mM; red circles) and anthracene- $d_{10}$  (0.50 mM; blue circles) by **1** (0.50 mM) in the presence of HOTf (2.5 mM) in MeCN at 233 K. The  $k_{\text{ox}}$  values were determined by using  $\log[x/(C + 2x)] = -(C/2.3)k_{\text{ox}}t + \log[x_0/(C + 2x_0)]$ , where  $x = [\mathbf{1}]$ ,  $x_0 = [\mathbf{1}]_0$ ,  $C = -x_0 = -[\mathbf{1}]_0$  and  $x_0/(C + 2x_0) = 1$  [eqn (5) in text].

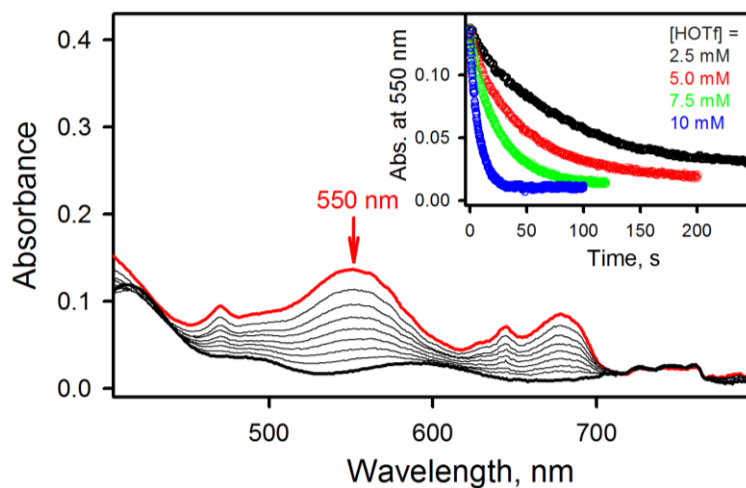

**Fig. S7** UV-visible spectral changes observed in the oxidation of anthracene (0.50 mM) by **1** (0.50 mM) in the presence of HOTf (10 mM) in MeCN at 233 K. Inset shows the time profiles at 550 nm due to decay of **1** (0.50 mM) in the oxidation of anthracene (0.50 mM) by **1** in the presence of HOTf [2.5 mM (black), 5.0 mM (red), 7.5 mM (green) and 10 mM, (blue)] in MeCN at 233 K.

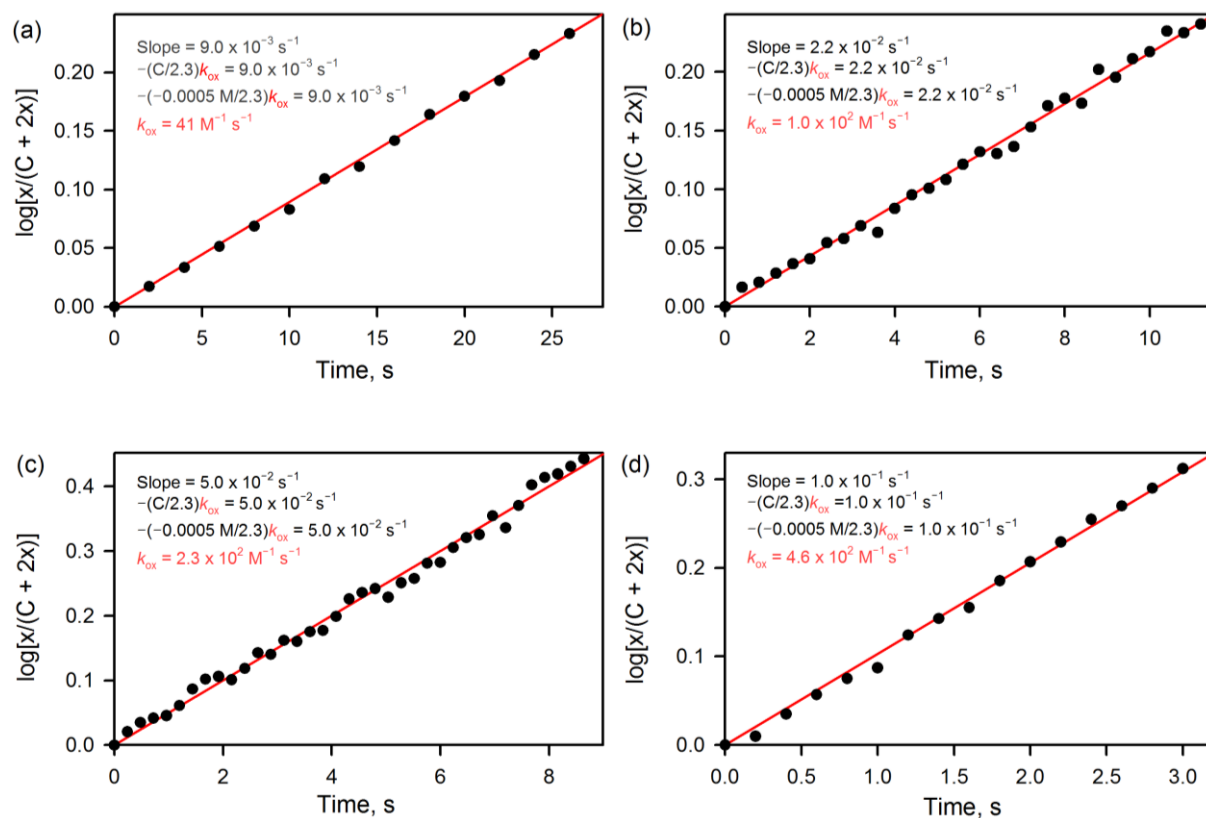

**Fig. S8** Plots of  $\log[x/(C + 2x)]$  vs. time for the oxidation of anthracene (0.50 mM) by **1** (0.50 mM) in the presence of HOFt [(a) 2.5 mM, (b) 5.0 mM, (c) 7.5 mM and (d) 10 mM] in MeCN at 233 K. The  $k_{\text{ox}}$  values were determined by using  $\log[x/(C + 2x)] = -(C/2.3)k_{\text{ox}}t + \log[x_0/(C + 2x_0)]$ , where  $x = [\mathbf{1}]$ ,  $x_0 = [\mathbf{1}]_0$ ,  $C = -[\mathbf{1}]_0$  and  $x_0/(C + 2x_0) = 1$  [eqn (5) in text].

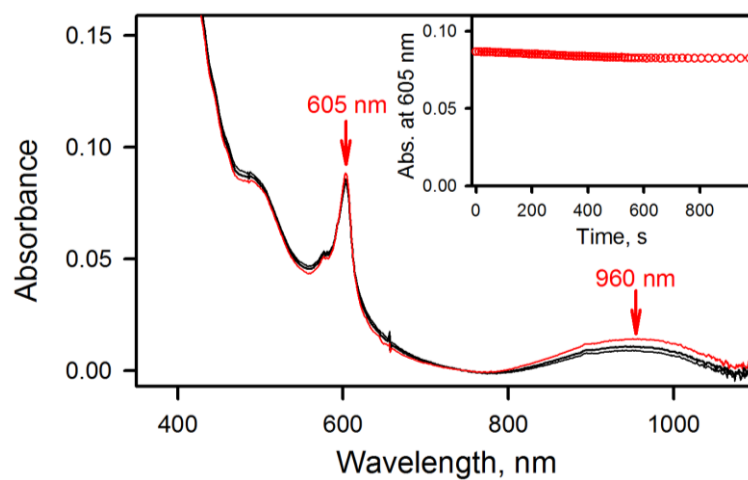

**Fig. S9** UV-vis spectral changes observed in the oxidation of anthracene (0.50 mM) by  $[\text{Cr}^{\text{IV}}(\text{TMC})(\text{O})]^{2+}$  (1.0 mM) in the presence of HOTf (2.5 mM) in MeCN at 233 K. The inset shows the time profile monitored at 605 nm due to the decay of  $[\text{Cr}^{\text{IV}}(\text{TMC})(\text{O})]^{2+}$ .

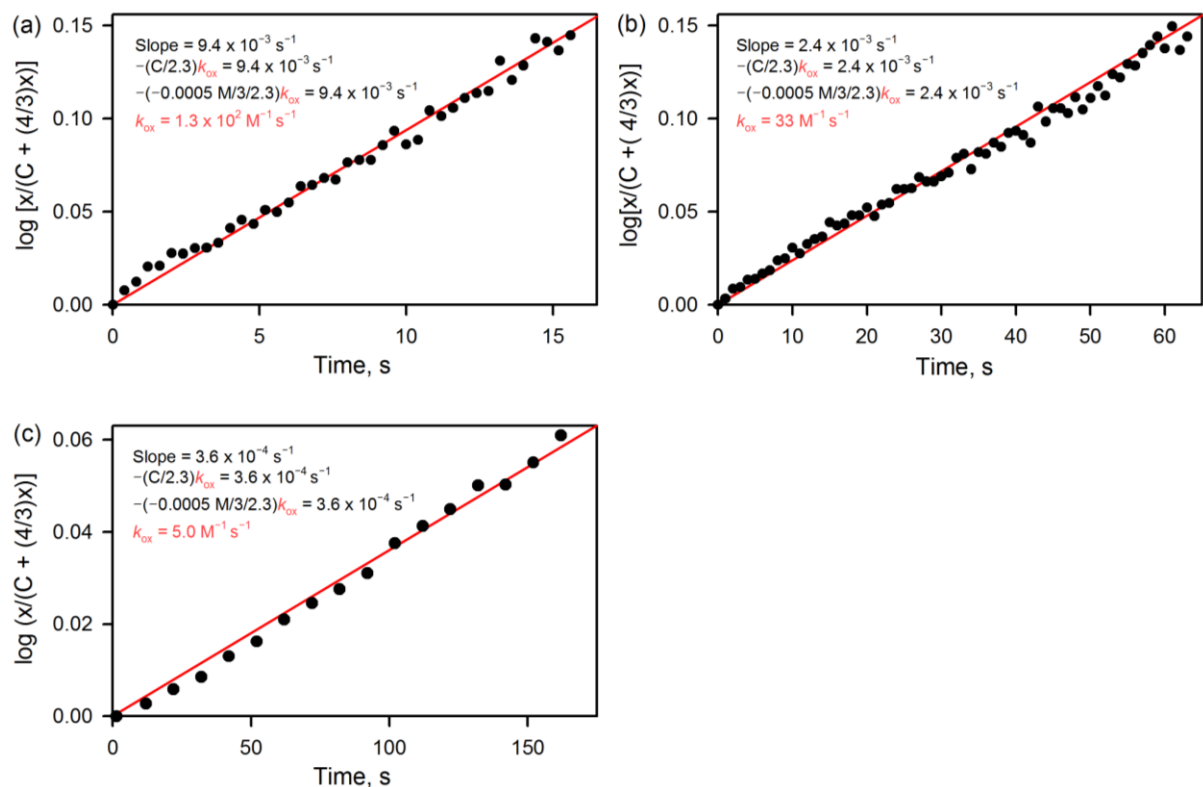

**Fig. S10** Plots of  $\log[x/(C + (4/3)x)]$  vs. time for the oxidation of (a) 9-methylantracene (0.50 mM), (b) 9-bromoanthracene (0.50 mM) and (c) 9-anthracenecarboxaldehyde (0.50 mM) by **1** (0.50 mM) in the presence of HOTf (2.5 mM) in MeCN at 233 K. The  $k_{\text{ox}}$  values were determined by using  $\log[x/(C + (4/3)x)] = -(C/2.3)k_{\text{ox}}t + \log [x_0/(C + (4/3)x_0)]$ , where  $x = [\mathbf{1}]$ ,  $x_0 = [\mathbf{1}]_0$ ,  $C = [\text{XAn}]_0 - (4/3)[\mathbf{1}]_0 = -1/3[\mathbf{1}]_0$  and  $x_0/(C + (4/3)x_0) = 1$  [eqn (S5) in ESI].



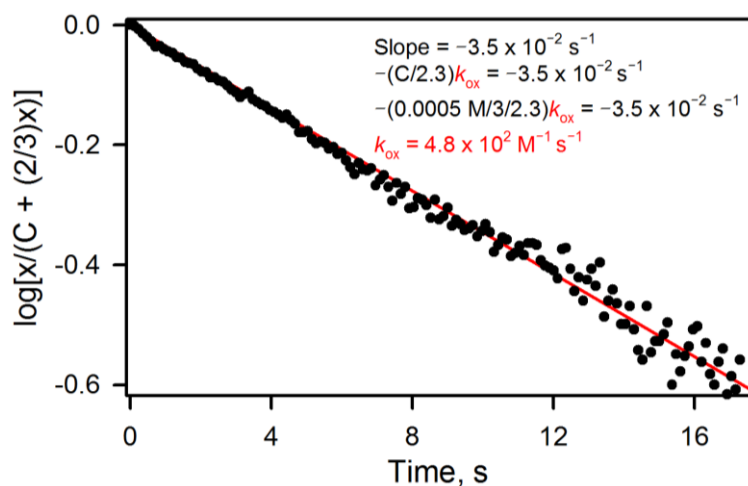

**Fig. S11** Plot of  $\log[x/(C + (2/3)x)]$  vs. time for the oxidation of 9,10-dimethylantracene (0.50 mM) by **1** (0.50 mM) in the presence of HOTf (2.5 mM) in MeCN at 233 K. The  $k_{\text{ox}}$  values were determined by using  $\log[x/(C + (2/3)x)] = -(C/2.3)k_{\text{ox}}t + \log[x_0/(C + (2/3)x_0)]$ , where  $x = [\mathbf{1}]$ ,  $x_0 = [\mathbf{1}]_0$ ,  $C = [\text{XAn}]_0 - (2/3)[\mathbf{1}]_0 = 1/3[\mathbf{1}]_0$  and  $x_0/(C + (2/3)x_0) = 1$  [eqn (S10) in ESI].
